# Supplementary material for: Springtime daily variations in lower-tropospheric ozone over east Asia: the role of cyclonic activity and pollution as observed from space with IASI
Source: Copernicus journal article supplement (doi:10.5194/acp-15-10839-2015), 2015-09-29
Supplement: Supplementary file [file acp-15-10839-2015-supplement.pdf]

Supplement of Atmos. Chem. Phys., 15, 10839–10856, 2015  
<http://www.atmos-chem-phys.net/15/10839/2015/>  
doi:10.5194/acp-15-10839-2015-supplement  
© Author(s) 2015. CC Attribution 3.0 License.

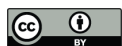

*Supplement of*

**Springtime daily variations in lower-tropospheric ozone over east Asia:  
the role of cyclonic activity and pollution as  
observed from space with IASI**

**G. Dufour et al.**

*Correspondence to:* G. Dufour (gaelle.dufour@lisa.u-pec.fr)

The copyright of individual parts of the supplement might differ from the CC-BY 3.0 licence.

NOAA HYSPLIT MODEL  
 Backward trajectories ending at 0000 UTC 06 May 08  
 GDAS Meteorological Data

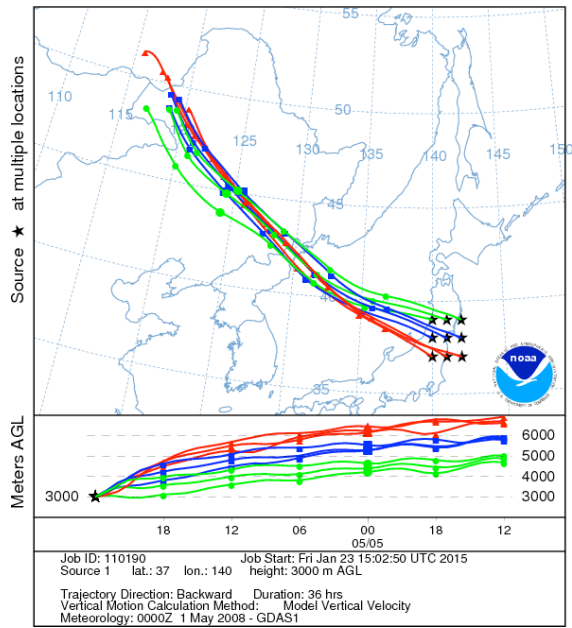

1  
 2 Figure S1. 36-hours backward trajectories ending at 3km on 6 May 2008 in the region of  
 3 Tokyo.

NOAA HYSPLIT MODEL  
 Backward trajectories ending at 0000 UTC 13 May 08  
 GDAS Meteorological Data

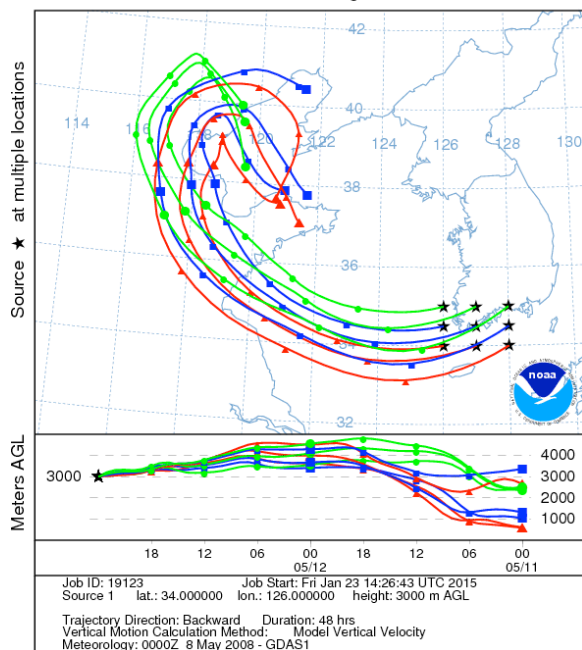

4  
 5 Figure S2. 48-hours backward trajectories ending at 3km on 13 May 2008 in the region of  
 6 South Korea.

NOAA HYSPLIT MODEL  
 Backward trajectories ending at 0000 UTC 11 May 08  
 GDAS Meteorological Data

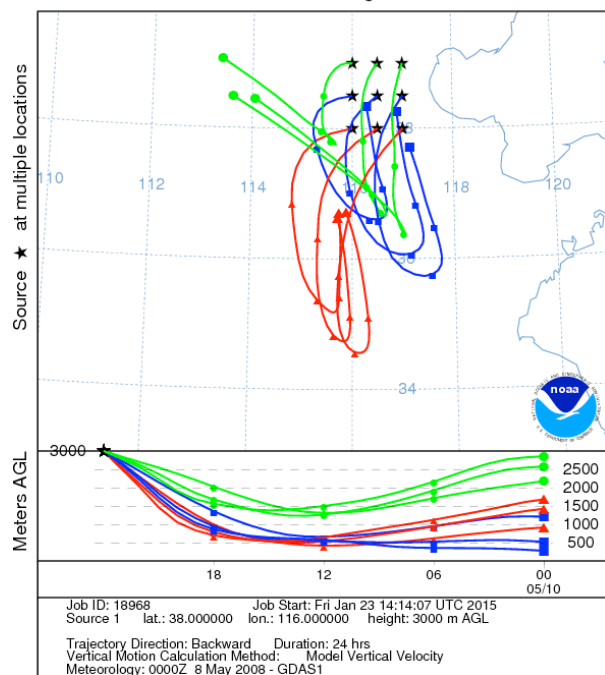

1  
 2 Figure S3. 24-hours backward trajectories ending at 3km on 11 May 2008 in the region of  
 3 Beijing.

4
